# Supplementary material for: Optogenetic control of nuclear protein export
Source: PubMed Central journal article supplement (PMC4748110; doi:10.1038/ncomms10624), 2016-02-08
Supplement: ncomms10624-s1.pdf [file ncomms10624-s1.pdf]

# Supplementary Figures

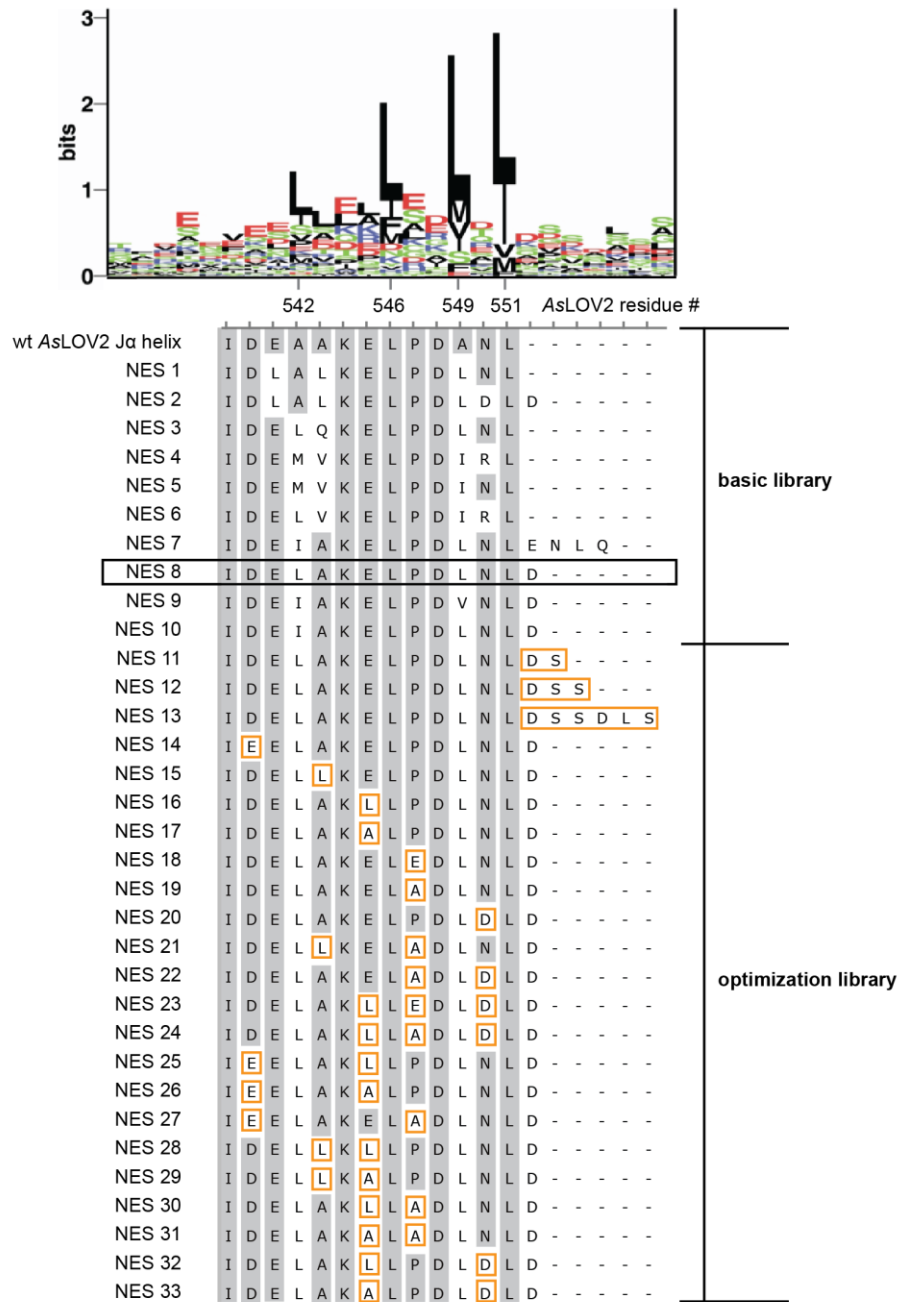

**Supplementary Figure 1** | Library of artificial AsLOV2-NES hybrids. Top: sequence logo derived from multiple sequence alignment of 58 experimentally

validated NESs (adapted from la Cour *et. al*, 2003)<sup>1</sup>. Below: alignment of artificial *AsLOV2*-NES hybrids variants to the wild type (wt) *AsLOV2* J $\alpha$  helix residues 539-551. The NES 8 variant (black rectangle) was used as lead candidate for generating the optimization library (NESs 11-33). Residues shaded in grey are identical to corresponding wt *AsLOV2* residues. Orange rectangles depict residues in NESs 11-33 that were altered as compared to the lead candidate NES 8.

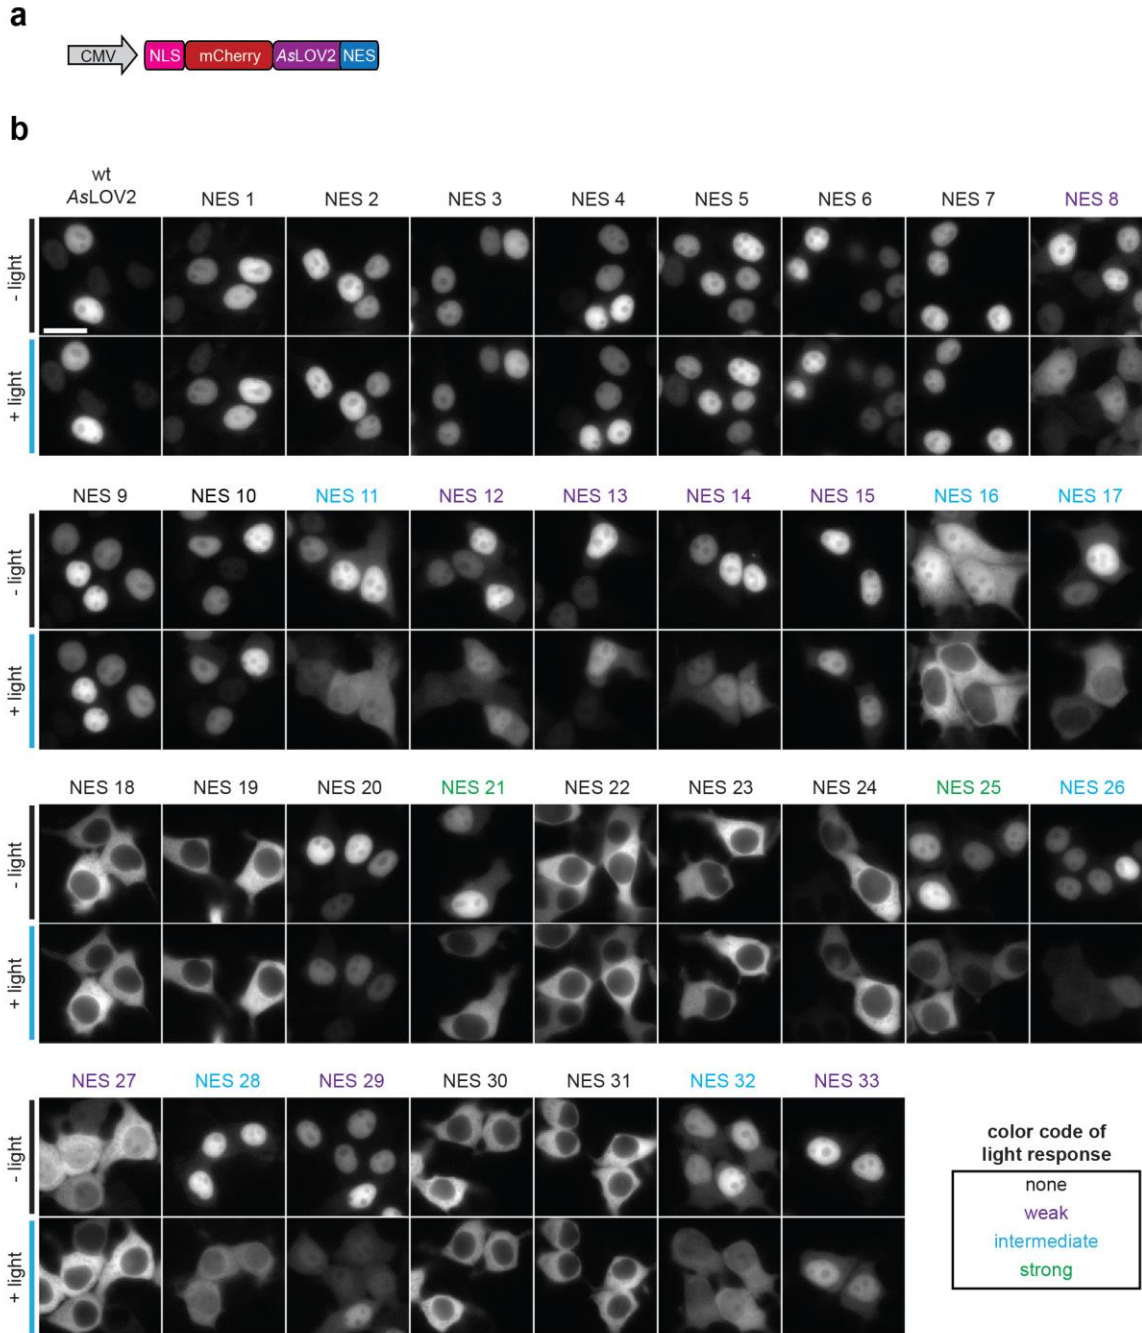

**Supplementary Figure 2** | Qualitative screen of AsLOV2-NES hybrids in HEK 293T cells. **(a)** Schematic of the general construct used. Each specific construct carries a distinct  $\alpha$  helix/NES hybrid whose sequence is shown in **Supplementary Fig. 1**. NLS: cMyc<sup>P1A</sup> NLS. CMV: immediate early cyomegalovirus promoter. **(b)**

Fluorescence microscopy images of cells transiently transfected with the indicated NLS-mCherry-AsLOV2-NES variant or a corresponding control construct bearing the wild type AsLOV2 domain (wt AsLOV2) prior to induction (- light) and after 15 min of illumination with blue light pulses (+ light). Scale bar, 20  $\mu\text{m}$ .

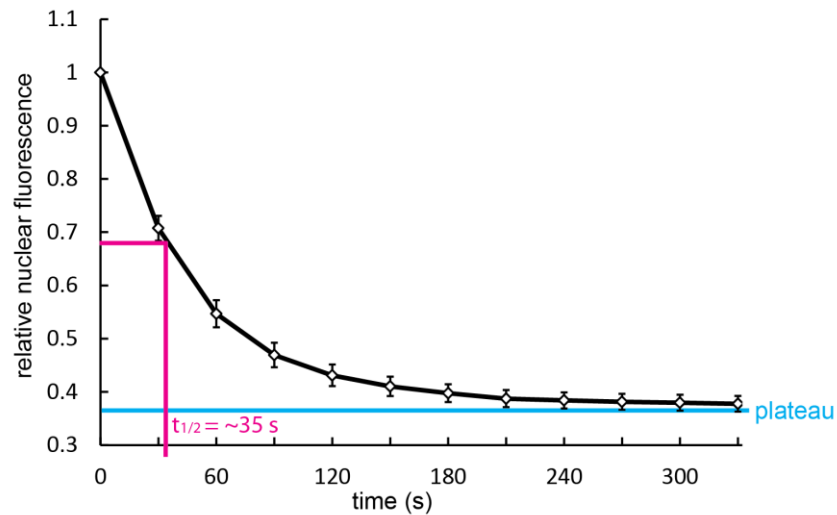

**Supplementary Figure 3** | Estimation of NLS-mCherry-LEXY nuclear export half-time in HEK 293T. Cells expressing NLS-mCherry-LEXY were induced with blue light pulses for 15 min. Only the first 330 s after starting the light exposure are shown (mean  $\pm$  s.e.m,  $n = 22$  cells, 3 independent experiments).

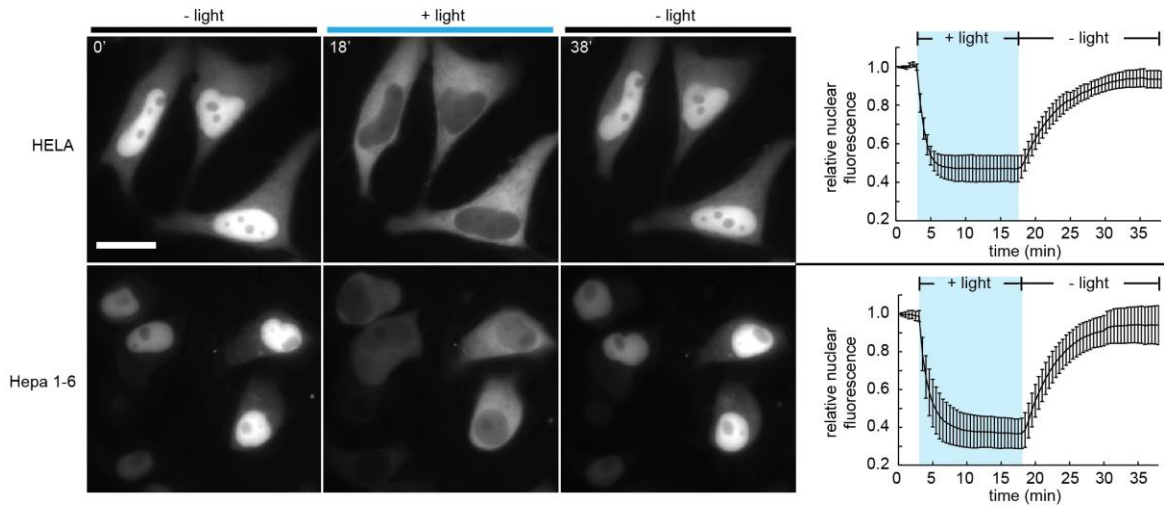

**Supplementary Figure 4** | LEXY functions in different cell lines. HELA cells and murine Hepa 1-6 cells transiently transfected with NLS-mCherry-LEXY were incubated in the dark for 3 min, then induced with blue light for 15 followed by a 20 min recovery phase in the dark. Left: fluorescence microscopy images at the indicated time points. Scale bar, 20  $\mu\text{m}$ . Right: Quantification of relative nuclear localization over time (mean  $\pm$  SD,  $n = 14$  cells, 2 independent experiments for HELA, and  $n = 24$  cells, 3 independent experiments for Hepa 1-6).

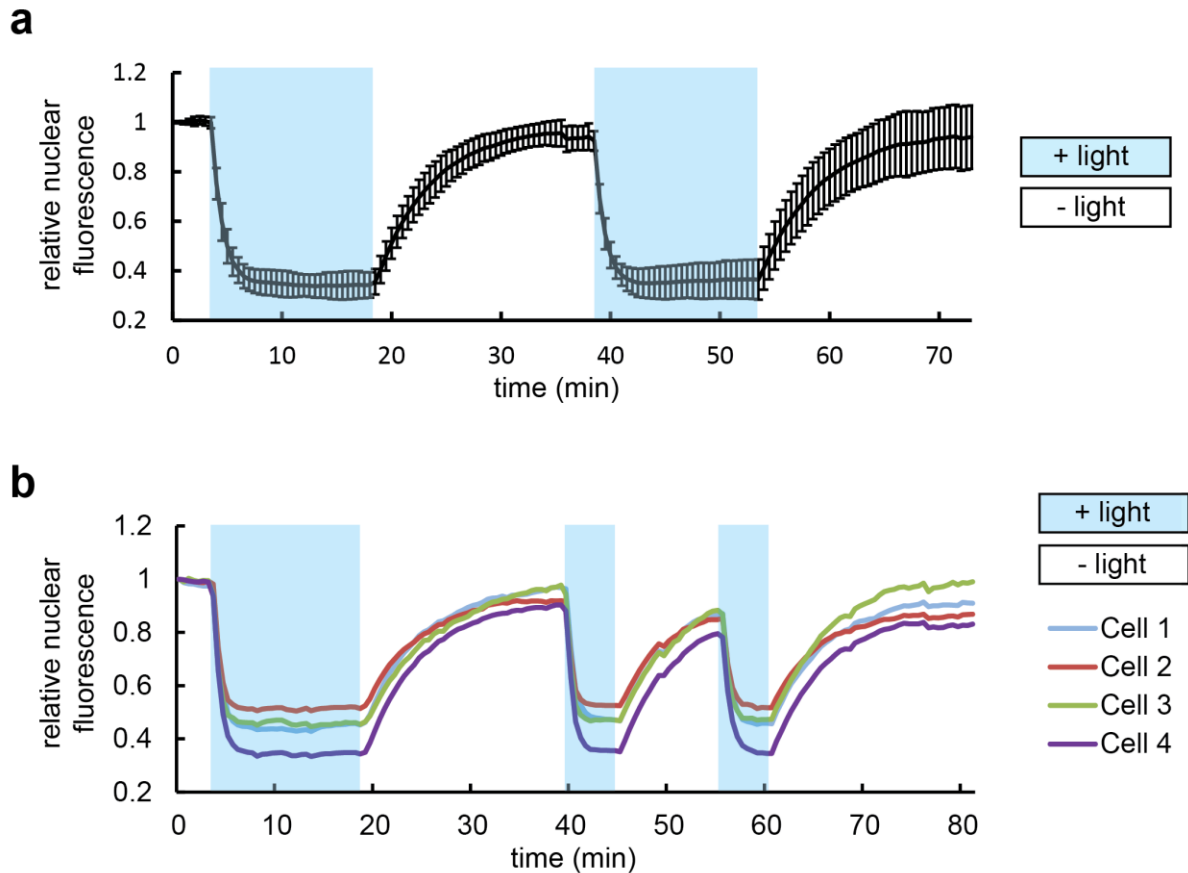

**Supplementary Figure 5** | Nuclear export can be induced repeatedly. **(a)** HEK 293T expressing NLS-mCherry-LEXY were incubated for 3 min in the dark, followed by two cycles of 15 min irradiation with blue light (indicated by the cyan box) and 20 min recovery in the dark (mean  $\pm$  SD,  $n = 10$  cells, 2 independent experiments). **(b)** HELA cells expressing NLS-mCherry-LEXY were incubated for 3 min in the dark followed by blue light irradiation (indicated by the cyan box) and dark recovery phases as indicated. Single-cell traces from 4 individual cells derived from 2 independent experiments are shown.

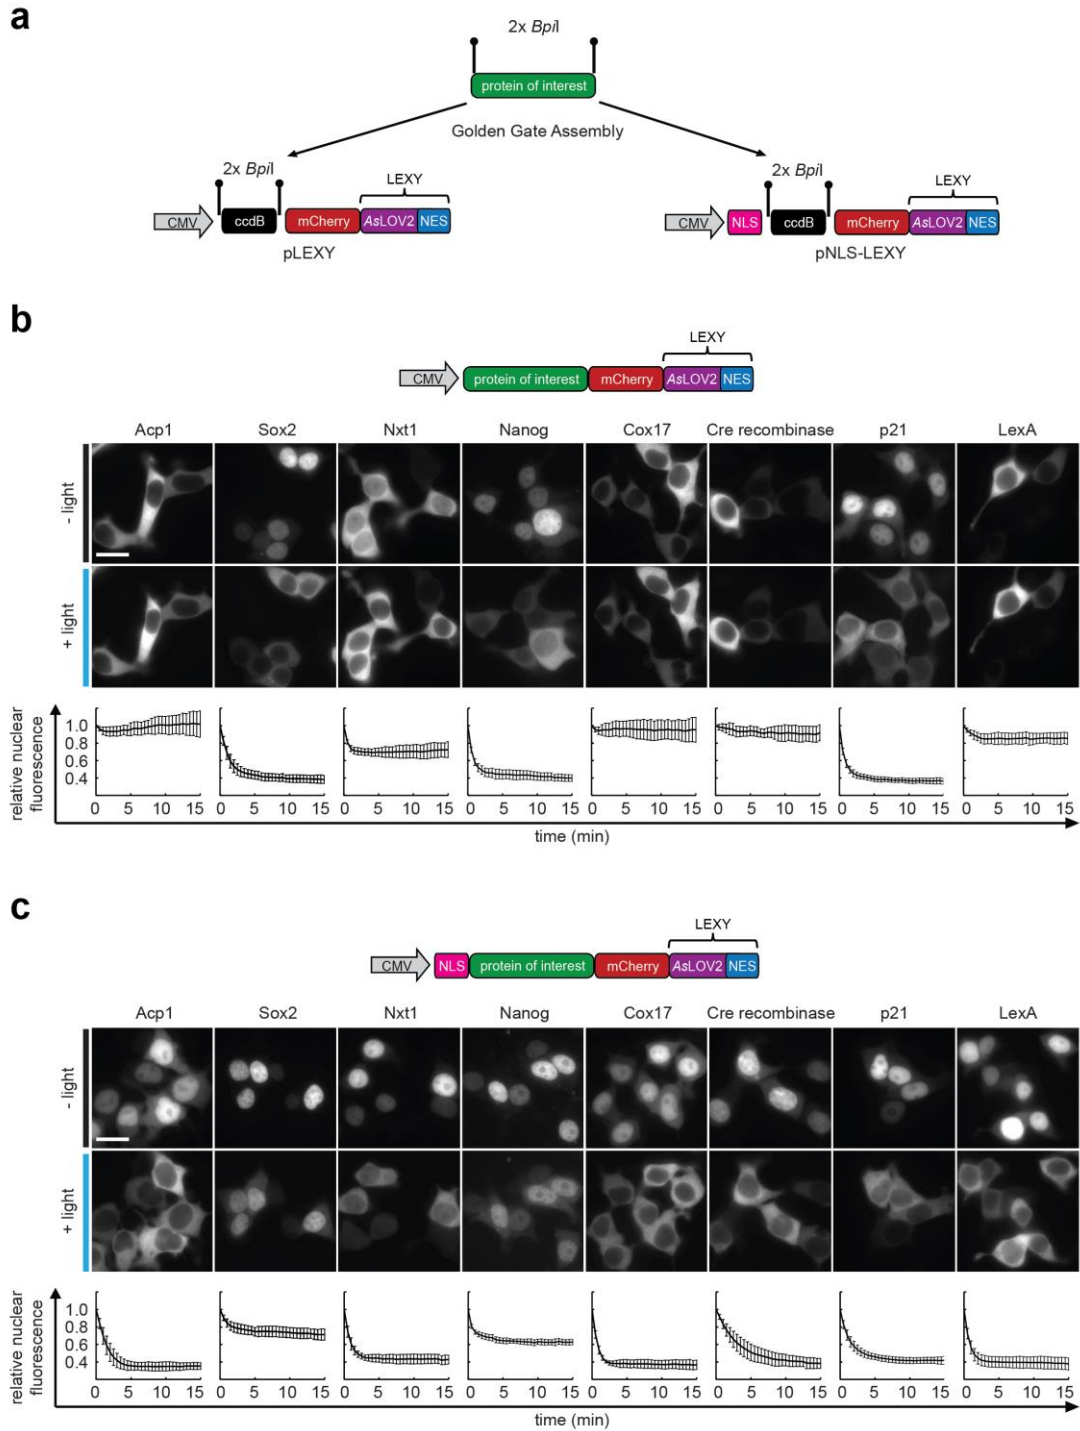

**Supplementary Figure 6** | Proteins of different type, size and origin can be exported with LEXY. **(a)** Scheme showing golden gate cloning strategy enabling easy tagging of proteins with mCherry-LEXY using the two indicated entry

vectors. CMV, immediate early cyomegalovirus promoter; *ccdB*, death gene; NLS, cMyc<sup>P1A</sup> NLS. **(b,c)** Top: Schematic of general construct used. Middle: Fluorescence microscopy images of 293T cells transfected with the indicated pLEXY **(b)** or pNLS-LEXY **(c)** variants prior to induction (- light) and after 15 min of illumination (+ light). Bottom: Corresponding quantifications of the relative nuclear fluorescence over time (mean  $\pm$  SD; sample sizes (i.e. number of cells) are  $n = 7$  for *Nxt1*,  $n = 8$  for *Acp1*, Cre recombinase and *LexA*,  $n = 11$  for *Sox2* and *p21*,  $n = 10$  for *Nanog* and *Cox17* (in **b**) and  $n = 7$  for *Acp1*,  $n = 8$  for *Sox2*, *Nxt1*, *Nanog* and *p21*,  $n = 9$  for *Cox17* and *LexA*,  $n = 10$  for Cre recombinase (in **c**)).

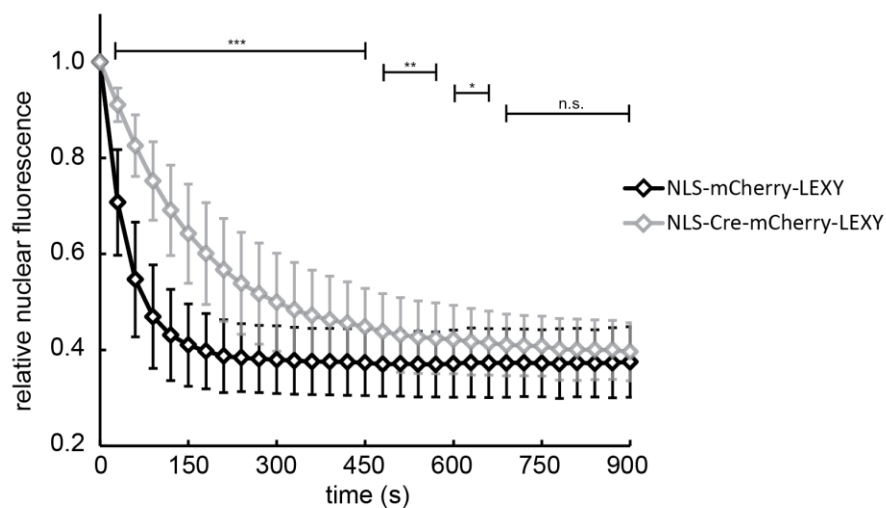

**Supplementary Figure 7** | Effect of protein size and DNA-binding activity on export kinetics. 293T cells were transiently transfected with the indicated constructs and illuminated with blue light (mean  $\pm$  SD,  $n = 22$  cells from 3 independent experiments for NLS-mCherry-LEXY, and  $n = 33$  cells from 4 independent experiments for NLS-Cre-mCherry-LEXY; \*  $P < 0.05$ , \*\*  $P < 0.01$ , \*\*\*  $P < 0.001$  by Welch's *t*-test).



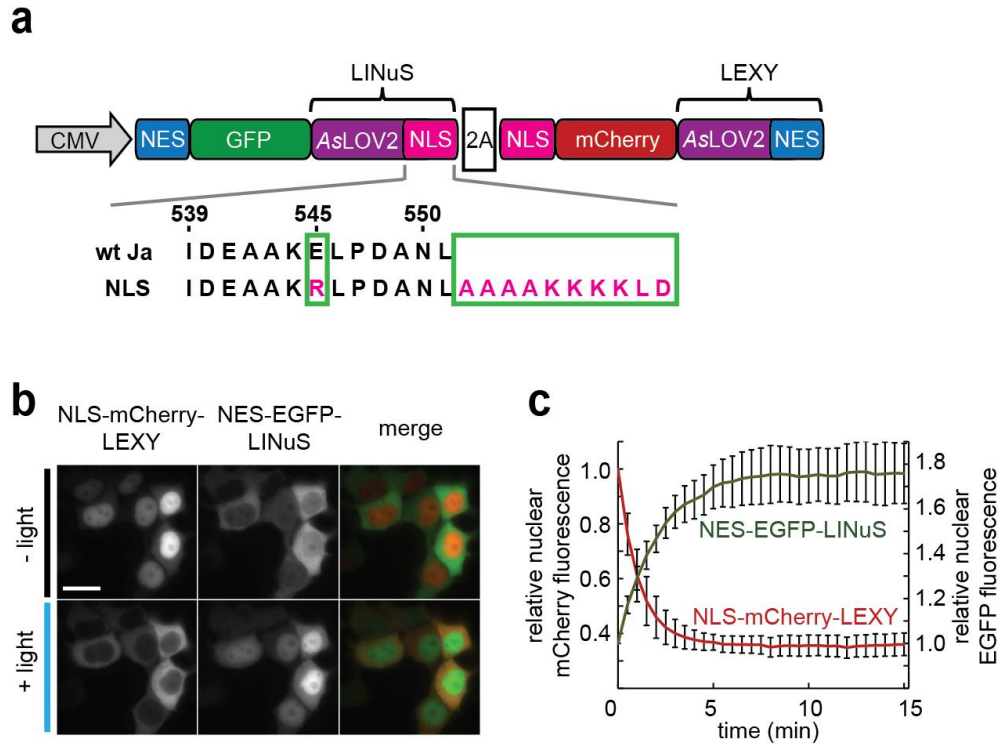

**Supplementary Figure 8** | Simultaneous light-control of nuclear import and export. **(a)** Schematic of a construct for co-expression of NES-GFP-LINuS and NLS-mCherry-LEXY. CMV, immediate early cytomegalovirus promoter. NES (N-terminal and constitutive),  $\text{I}\kappa\text{B}\alpha$  NES. LINuS, light-inducible nuclear localization signal (biLINuS 2 variant)<sup>2</sup>. 2A, T2A peptide. Green boxes indicate amino acid residues in LINuS that are altered as compared to the wild type *AsLOV2*  $\text{J}\alpha$  helix (wt  $\text{J}\alpha$ ). Numbers show the position of the corresponding residues in the full-length *AsLOV2* domain. **(b)** Fluorescence microscopy images of HEK 293T transiently transfected with the construct in **(a)** before (- light) and after (+ light) illumination with blue light for 15 min. Scale bar, 20  $\mu\text{m}$ . **(c)** Corresponding quantification of the relative nuclear fluorescence of the cells shown in **b** (mean  $\pm$  SD,  $n = 25$  cells from 3 independent experiments).

# Supplementary Tables

**Supplementary Tab. 1: Plasmids used and developed in this study**

| #  | Name              | Backbone     | Insert/expressed fusion protein           | Promoter                                       | NLS                 | AsLOV2-NES hybrid | Source                                                          |
|----|-------------------|--------------|-------------------------------------------|------------------------------------------------|---------------------|-------------------|-----------------------------------------------------------------|
| 1  | pEGFP-N1          | /            | EGFP                                      | CMV                                            | /                   | /                 | Clontech                                                        |
| 2  | pcDNA3.1 (+)      |              | /                                         | CMV                                            | /                   | /                 | Invitrogen                                                      |
| 3  | pmCherry-N1       | /            | mCherry                                   | CMV                                            | /                   | /                 | Clontech                                                        |
| 4  | H2B-GFP           | pEGFP-N1     | H2B-GFP                                   | CMV                                            | /                   | /                 | kind gift from Geoff Wahl <sup>3</sup> (Addgene plasmid #11680) |
| 5  | pDonor            | /            | ccdB                                      | /                                              | /                   | /                 | Invitrogen                                                      |
| 6  | pRL-TK            | /            | renilla luciferase                        | TK                                             | /                   | /                 | Promega                                                         |
| 7  | pBluescript II SK | /            | /                                         | /                                              | /                   | /                 | /                                                               |
| 8  | p53               | /            | wild type human p53                       | CMV                                            | /                   | /                 | /                                                               |
| 9  | pDN34             | pcDNA3.1 (-) | PKIt_NES-mCherry-AsLOV2-biLINuS2          | CMV                                            | AsLOV2-biNLS2       | /                 | previous work by us <sup>2</sup> (Addgene plasmid #61343)       |
| 10 | pDN77             | pcDNA3.1 (-) | IkB $\alpha$ _NES-mCherry-AsLOV2-biLINuS2 | CMV                                            | AsLOV2-biNLS2       | /                 | previous work by us <sup>2</sup> (Addgene plasmid #61347)       |
| 11 | pDN100            | pFR-Luc      | firefly luciferase                        | 4xLexA binding site dependent minimal promoter | /                   | /                 | previous work by us <sup>2</sup>                                |
| 12 | pDN101            | pcDNA3.1 (-) | NLS-mCherry-AsLOV2-biNLS2                 | CMV                                            | cMyc <sup>P1A</sup> | /                 | This Work                                                       |
| 13 | pDN102            | pcDNA3.1 (-) | NLS-mCherry-AsLOV2-NES                    | CMV                                            | cMyc <sup>P1A</sup> | NES 1             | This Work                                                       |
| 14 | pDN103            | pcDNA3.1 (-) | NLS-mCherry-AsLOV2-NES                    | CMV                                            | cMyc <sup>P1A</sup> | NES 2             | This Work                                                       |
| 15 | pDN104            | pcDNA3.1 (-) | NLS-mCherry-AsLOV2-NES                    | CMV                                            | cMyc <sup>P1A</sup> | NES 3             | This Work                                                       |
| 16 | pDN105            | pcDNA3.1 (-) | NLS-mCherry-AsLOV2-NES                    | CMV                                            | cMyc <sup>P1A</sup> | NES 4             | This Work                                                       |
| 17 | pDN106            | pcDNA3.1 (-) | NLS-mCherry-AsLOV2-NES                    | CMV                                            | cMyc <sup>P1A</sup> | NES 5             | This Work                                                       |
| 18 | pDN107            | pcDNA3.1 (-) | NLS-mCherry-AsLOV2-NES                    | CMV                                            | cMyc <sup>P1A</sup> | NES 6             | This Work                                                       |
| 19 | pDN108            | pcDNA3.1 (-) | NLS-mCherry-AsLOV2-NES                    | CMV                                            | cMyc <sup>P1A</sup> | NES 7             | This Work                                                       |
| 20 | pDN109            | pcDNA3.1 (-) | NLS-mCherry-AsLOV2-NES                    | CMV                                            | cMyc <sup>P1A</sup> | NES 8             | This Work                                                       |
| 21 | pDN110            | pcDNA3.1 (-) | NLS-mCherry-AsLOV2-NES                    | CMV                                            | cMyc <sup>P1A</sup> | NES 9             | This Work                                                       |
| 22 | pDN111            | pcDNA3.1 (-) | NLS-mCherry-AsLOV2-NES                    | CMV                                            | cMyc <sup>P1A</sup> | NES 10            | This Work                                                       |
| 23 | pDN112            | pcDNA3.1 (-) | NLS-mCherry-AsLOV2-NES                    | CMV                                            | cMyc <sup>P1A</sup> | NES 11            | This Work                                                       |
| 24 | pDN113            | pcDNA3.1 (-) | NLS-mCherry-AsLOV2-NES                    | CMV                                            | cMyc <sup>P1A</sup> | NES 12            | This Work                                                       |

Supplementary Tab. 1 continued

| #  | Name               | Backbone     | Insert/expressed fusion protein                            | Promoter | NLS                 | AsLOV2-NES hybrid | Source    |
|----|--------------------|--------------|------------------------------------------------------------|----------|---------------------|-------------------|-----------|
| 25 | pDN114             | pcDNA3.1 (-) | NLS-mCherry-AsLOV2-NES                                     | CMV      | cMyc <sup>P1A</sup> | NES 13            | This Work |
| 26 | pDN115             | pcDNA3.1 (-) | NLS-mCherry-AsLOV2-NES                                     | CMV      | cMyc <sup>P1A</sup> | NES 14            | This Work |
| 27 | pDN116             | pcDNA3.1 (-) | NLS-mCherry-AsLOV2-NES                                     | CMV      | cMyc <sup>P1A</sup> | NES 15            | This Work |
| 28 | pDN117             | pcDNA3.1 (-) | NLS-mCherry-AsLOV2-NES                                     | CMV      | cMyc <sup>P1A</sup> | NES 16            | This Work |
| 29 | pDN118             | pcDNA3.1 (-) | NLS-mCherry-AsLOV2-NES                                     | CMV      | cMyc <sup>P1A</sup> | NES 17            | This Work |
| 30 | pDN119             | pcDNA3.1 (-) | NLS-mCherry-AsLOV2-NES                                     | CMV      | cMyc <sup>P1A</sup> | NES 18            | This Work |
| 31 | pDN120             | pcDNA3.1 (-) | NLS-mCherry-AsLOV2-NES                                     | CMV      | cMyc <sup>P1A</sup> | NES 19            | This Work |
| 32 | pDN121             | pcDNA3.1 (-) | NLS-mCherry-AsLOV2-NES                                     | CMV      | cMyc <sup>P1A</sup> | NES 20            | This Work |
| 33 | pDN122             | pcDNA3.1 (-) | NLS-mCherry-AsLOV2-NES                                     | CMV      | cMyc <sup>P1A</sup> | NES 21            | This Work |
| 34 | pDN123             | pcDNA3.1 (-) | NLS-mCherry-AsLOV2-NES                                     | CMV      | cMyc <sup>P1A</sup> | NES 22            | This Work |
| 35 | pDN124             | pcDNA3.1 (-) | NLS-mCherry-AsLOV2-NES                                     | CMV      | cMyc <sup>P1A</sup> | NES 23            | This Work |
| 36 | pDN125             | pcDNA3.1 (-) | NLS-mCherry-AsLOV2-NES                                     | CMV      | cMyc <sup>P1A</sup> | NES 24            | This Work |
| 37 | pDN126             | pcDNA3.1 (-) | NLS-mCherry-AsLOV2-NES                                     | CMV      | cMyc <sup>P1A</sup> | NES 25            | This Work |
| 38 | pDN127             | pcDNA3.1 (-) | NLS-mCherry-AsLOV2-NES                                     | CMV      | cMyc <sup>P1A</sup> | NES 26            | This Work |
| 39 | pDN128             | pcDNA3.1 (-) | NLS-mCherry-AsLOV2-NES                                     | CMV      | cMyc <sup>P1A</sup> | NES 27            | This Work |
| 40 | pDN129             | pcDNA3.1 (-) | NLS-mCherry-AsLOV2-NES                                     | CMV      | cMyc <sup>P1A</sup> | NES 28            | This Work |
| 41 | pDN130             | pcDNA3.1 (-) | NLS-mCherry-AsLOV2-NES                                     | CMV      | cMyc <sup>P1A</sup> | NES 29            | This Work |
| 42 | pDN131             | pcDNA3.1 (-) | NLS-mCherry-AsLOV2-NES                                     | CMV      | cMyc <sup>P1A</sup> | NES 30            | This Work |
| 43 | pDN132             | pcDNA3.1 (-) | NLS-mCherry-AsLOV2-NES                                     | CMV      | cMyc <sup>P1A</sup> | NES 31            | This Work |
| 44 | pDN133             | pcDNA3.1 (-) | NLS-mCherry-AsLOV2-NES                                     | CMV      | cMyc <sup>P1A</sup> | NES 32            | This Work |
| 45 | pDN134             | pcDNA3.1 (-) | NLS-mCherry-AsLOV2-NES                                     | CMV      | cMyc <sup>P1A</sup> | NES 33            | This Work |
| 46 | pDN135             | pcDNA3.1 (-) | NLS-mCherry-(wild-type)AsLOV2                              | CMV      | cMyc <sup>P1A</sup> | /                 | This Work |
| 47 | pDN136             | pcDNA3.1 (-) | H2B-GFP-T2A-NLS-mCherry-AsLOV2-NES                         | CMV      | cMyc <sup>P1A</sup> | NES 21            | This Work |
| 48 | pDN137 (pLEXY)     | pEGFP-N1     | <i>Bbsl</i> x <i>ccdB</i> x <i>Bbsl</i> -mCherry-LEXY      | CMV      | /                   | NES 21            | This Work |
| 49 | pDN138 (pNLS-LEXY) | pEGFP-N1     | NLS- <i>Bbsl</i> x <i>ccdB</i> x <i>Bbsl</i> -mCherry-LEXY | CMV      | cMyc <sup>P1A</sup> | NES 21            | This Work |
| 50 | pDN139             | pEGFP-N1     | NLS-ACP1-mCherry-AsLOV2-NES                                | CMV      | cMyc <sup>P1A</sup> | NES 21            | This Work |
| 51 | pDN140             | pEGFP-N1     | NLS-Sox2-mCherry-AsLOV2-NES                                | CMV      | cMyc <sup>P1A</sup> | NES 21            | This Work |
| 52 | pDN141             | pEGFP-N1     | NLS-Nanog-mCherry-AsLOV2-NES                               | CMV      | cMyc <sup>P1A</sup> | NES 21            | This Work |
| 53 | pDN142             | pEGFP-N1     | NLS-Nxt1-mCherry-AsLOV2-NES                                | CMV      | cMyc <sup>P1A</sup> | NES 21            | This Work |
| 54 | pDN143             | pEGFP-N1     | NLS-Cox17-mCherry-AsLOV2-NES                               | CMV      | cMyc <sup>P1A</sup> | NES 21            | This Work |
| 55 | pDN144             | pEGFP-N1     | NLS-p21-mCherry-AsLOV2-NES                                 | CMV      | cMyc <sup>P1A</sup> | NES 21            | This Work |
| 56 | pDN145             | pEGFP-N1     | NLS-Cre_recombinase-mCherry-AsLOV2-NES                     | CMV      | cMyc <sup>P1A</sup> | NES 21            | This Work |
| 57 | pDN146             | pEGFP-N1     | NLS-LexA-mCherry-AsLOV2-NES                                | CMV      | cMyc <sup>P1A</sup> | NES 21            | This Work |

Supplementary Tab. 1 continued

| #  | Name                | Backbone     | Insert/expressed fusion protein                                | Promoter | NLS                 | AsLOV2-NES hybrid | Source    |
|----|---------------------|--------------|----------------------------------------------------------------|----------|---------------------|-------------------|-----------|
| 58 | pDN147              | pEGFP-N1     | ACP1-mCherry-AsLOV2-NES                                        | CMV      | not present         | NES 21            | This Work |
| 59 | pDN148              | pEGFP-N1     | Sox2-mCherry-AsLOV2-NES                                        | CMV      | not present         | NES 21            | This Work |
| 60 | pDN149              | pEGFP-N1     | Nanog-mCherry-AsLOV2-NES                                       | CMV      | not present         | NES 21            | This Work |
| 61 | pDN150              | pEGFP-N1     | Nxt1-mCherry-AsLOV2-NES                                        | CMV      | not present         | NES 21            | This Work |
| 62 | pDN151              | pEGFP-N1     | Cox17-mCherry-AsLOV2-NES                                       | CMV      | not present         | NES 21            | This Work |
| 63 | pDN152              | pEGFP-N1     | p21-mCherry-AsLOV2-NES                                         | CMV      | not present         | NES 21            | This Work |
| 64 | pDN153              | pEGFP-N1     | Cre_recombinase-mCherry-AsLOV2-NES                             | CMV      | not present         | NES 21            | This Work |
| 65 | pDN154              | pEGFP-N1     | LexA-mCherry-AsLOV2-NES                                        | CMV      | not present         | NES 21            | This Work |
| 66 | pDN155              | pcDNA3.1 (-) | IkB $\alpha$ _NES-EGFP-biLINuS2                                | CMV      | as indicated        | /                 | This Work |
| 67 | pDN156              | pcDNA3.1 (-) | IkB $\alpha$ _NES-EGFP-biLINuS2-T2A-cMyc(P1A)_NLS-mCherry-LEXY | CMV      | as indicated        | as indicated      | This Work |
| 68 | pDN157              | pEGFP-N1     | H2B-GFP-LEXY                                                   | CMV      | /                   | NES 21            | This Work |
| 69 | pDN158              | pEGFP-N1     | H2B-GFP-AsLOV2-NES27                                           | CMV      | /                   | NES 27            | This Work |
| 70 | pDN159              | pEGFP-N1     | H2B-GFP-(wild-type)AsLOV2                                      | CMV      | /                   | /                 | This Work |
| 71 | pDN160              | pcDNA3.1 (-) | NLS-mCherry-NES 17                                             | CMV      | cMyc <sup>P1A</sup> | /                 | This Work |
| 72 | pDN161 (pANY-entry) | pEGFP-N1     | <i>Bbsl</i> x <i>ccdB</i> x <i>Bbsl</i>                        | CMV      | /                   | /                 | This Work |
| 73 | pDN162              | pEGFP-N1     | LexATF-T2A-NLS-LexA-mCherry-LEXY                               | CMV      | cMyc <sup>P1A</sup> | NES 21            | This Work |
| 74 | pDN163              | pEGFP-N1     | LexATF-T2A-NLS-LexA-KRAB-mCherry-LEXY                          | CMV      | cMyc <sup>P1A</sup> | NES 21            | This Work |
| 75 | pDN164              | pEGFP-N1     | LexATF-T2A-NLS-mCherry-LEXY                                    | CMV      | cMyc <sup>P1A</sup> | NES 21            | This Work |
| 76 | pPW1                | pEGFP-N1     | NLS-p53-mCherry-LEXY                                           | CMV      | cMyc <sup>P1A</sup> | NES 21            | This Work |
| 77 | pPW2                | pcDNA3.1 (+) | p53-mCherry                                                    | CMV      | /                   | /                 | This Work |
| 78 | pPW3                | pcDNA3.1 (+) | p53-NES-mCherry                                                | CMV      | /                   | /                 | This Work |

**Supplementary Tab. 2: Oligonucleotide sequences**

| oligo # | Sequence 5' --> 3'                                             | NES introduced |
|---------|----------------------------------------------------------------|----------------|
| 1       | TTTTCGTCTCTGTGAGCAAGGGCGAGGAGGATAAC                            | /              |
| 2       | TTTTCGTCTCTCATGCTAGCCAGCTTGGGTCTCCCTATAGTG                     |                |
| 3       | CATGGCCGCAGCAAAGCGCGTGAAGCTGGAC                                |                |
| 4       | TCACGTCCAGCTTCACGCGCTTTGCTGCGGC                                |                |
| 5       | TTTTCGTCTCTCAATATTTTCTGCAGTTTTCTTAATCAG                        |                |
| 6       | TTTTCGTCTCTTAGCTCGAGCGGCCGCACTGTGCTGGATATC                     |                |
| 7       | ATTGACCTGGCACTGAAGGAGCTGCCCCGACCTGAACCTG                       | NES1           |
| 8       | GCTACAGGTTCAGGTCGGGCAGCTCCTTCAGTGCCAGGT                        | NES2           |
| 9       | ATTGACCTGGCACTGAAGGAGCTGCCCCGACCTGGACCTGGAC                    |                |
| 10      | GCTAGTCCAGGTCAGGTCGGGCAGCTCCTTCAGTGCCAGGT                      | NES3           |
| 11      | ATTGACGAGCTGCAGAAGGAGCTGCCCCGACCTGAACCTG                       |                |
| 12      | GCTACAGGTTCAGGTCGGGCAGCTCCTTCTGCAGCTCGT                        | NES4           |
| 13      | ATTGACGAGATGGTGAAGGAGCTGCCCCGACATCCGCCTG                       |                |
| 14      | GCTACAGGCGGATGTCGGGCAGCTCCTTCACCATCTCGT                        | NES5           |
| 15      | ATTGACGAGATGGTGAAGGAGCTGCCCCGACATCAACCTG                       |                |
| 16      | GCTACAGGTTGATGTGCGGGCAGCTCCTTCACCATCTCGT                       | NES6           |
| 17      | ATTGACGAGCTGGTGAAGGAGCTGCCCCGACATCCGCCTG                       |                |
| 18      | GCTACAGGCGGATGTCGGGCAGCTCCTTCACCATCTCGT                        | NES7           |
| 19      | ATTGACGAGATCGCAAAGGAGCTGCCCCGACCTGAACCTGGAGAACCTGCAG           |                |
| 20      | GCTACTGCAGTTTCTCCAGGTTTCAGGTCGGGCAGCTCCTTTGCGATCTCGT           | NES8           |
| 21      | ATTGACGAGCTGGCAAAGGAGCTGCCCCGACCTGAACCTGGAC                    |                |
| 22      | GCTAGTCCAGGTTTCAGGTCGGGCAGCTCCTTTGCCAGCTCGT                    | NES9           |
| 23      | ATTGACGAGATCGCAAAGGAGCTGCCCCGACCTGAACCTGGAC                    |                |
| 24      | GCTAGTCCAGGTTTCAGGTCGGGCAGCTCCTTTGCGATCTCGT                    | NES10          |
| 25      | ATTGACGAGATCGCAAAGGAGCTGCCCCGACCTGAACCTGGAC                    |                |
| 26      | GCTAGTCCAGGTTTCAGGTCGGGCAGCTCCTTTGCGATCTCGT                    | NES11          |
| 27      | ATTGACGAGCTGGCCAAGGAGCTGCCCCGACCTGAACCTGGACAGC                 |                |
| 28      | GCTAGCTGTCCAGGTTTCAGGTCGGGCAGCTCCTTGGCCAGCTCGT                 | NES12          |
| 29      | ATTGACGAGCTGGCCAAGGAGCTGCCCCGACCTGAACCTGGACAGCAGC              |                |
| 30      | GCTAGCTGCTGTCCAGGTTTCAGGTCGGGCAGCTCCTTGGCCAGCTCGT              | NES13          |
| 31      | ATTGACGAGCTGGCCAAGGAGCTGCCCCGACCTGAACCTGGACAGCAGCAGC<br>CTGAGC |                |
| 32      | GCTAGCTCAGGTCGCTGCTGTCCAGGTTTCAGGTCGGGCAGCTCCTTGGCCAG<br>CTCGT | NES14          |
| 33      | ATTGAGGAGCTGGCCAAGGAGCTGCCCCGACCTGAACCTGGAC                    |                |
| 34      | GCTAGTCCAGGTTTCAGGTCGGGCAGCTCCTTGGCCAGCTCCT                    | NES15          |
| 35      | ATTGACGAGCTGCTGAAGGAGCTGCCCCGACCTGAACCTGGAC                    |                |
| 36      | GCTAGTCCAGGTTTCAGGTCGGGCAGCTCCTTCAGCAGCTCGT                    |                |

Supplementary Tab. 2 continued

| oligo # | Sequence 5' --> 3'                          | NES introduced |
|---------|---------------------------------------------|----------------|
| 37      | ATTGACGAGCTGGCCAAGCTGCTGCCCCGACCTGAACCTGGAC | NES16          |
| 38      | GCTAGTCCAGGTTTCAGGTCGGGCAGCAGCTTGCCAGCTCGT  |                |
| 39      | ATTGACGAGCTGGCCAAGGCCCTGCCCCGACCTGAACCTGGAC | NES17          |
| 40      | GCTAGTCCAGGTTTCAGGTCGGGCAGGGCCTTGCCAGCTCGT  |                |
| 41      | ATTGACGAGCTGGCCAAGGAGCTGGAGGACCTGAACCTGGAC  | NES18          |
| 42      | GCTAGTCCAGGTTTCAGGTCCTCCAGCTCCTTGCCAGCTCGT  |                |
| 43      | ATTGACGAGCTGGCCAAGGAGCTGGCCGACCTGAACCTGGAC  | NES19          |
| 44      | GCTAGTCCAGGTTTCAGGTCGGCCAGCTCCTTGCCAGCTCGT  |                |
| 45      | ATTGACGAGCTGGCCAAGGAGCTGCCCCGACCTGGACCTGGAC | NES20          |
| 46      | GCTAGTCCAGGTTTCAGGTCGGGCAGCTCCTTGCCAGCTCGT  |                |
| 47      | ATTGACGAGCTGCTGAAGGAGCTGGCCGACCTGAACCTGGAC  | NES21          |
| 48      | GCTAGTCCAGGTTTCAGGTCGGCCAGCTCCTTCAGCAGCTCGT |                |
| 49      | ATTGACGAGCTGGCCAAGGAGCTGGCCGACCTGGACCTGGAC  | NES22          |
| 50      | GCTAGTCCAGGTTTCAGGTCGGCCAGCTCCTTGCCAGCTCGT  |                |
| 51      | ATTGACGAGCTGGCCAAGCTGCTGGAGGACCTGGACCTGGAC  | NES23          |
| 52      | GCTAGTCCAGGTTTCAGGTCCTCCAGCAGCTTGCCAGCTCGT  |                |
| 53      | ATTGACGAGCTGGCCAAGCTGCTGGCCGACCTGGACCTGGAC  | NES24          |
| 54      | GCTAGTCCAGGTTTCAGGTCGGCCAGCAGCTTGCCAGCTCGT  |                |
| 55      | ATTGAGGAGCTGGCCAAGCTGCTGCCCCGACCTGAACCTGGAC | NES25          |
| 56      | GCTAGTCCAGGTTTCAGGTCGGGCAGCAGCTTGCCAGCTCCT  |                |
| 57      | ATTGAGGAGCTGGCCAAGGCCCTGCCCCGACCTGAACCTGGAC | NES26          |
| 58      | GCTAGTCCAGGTTTCAGGTCGGGCAGGGCCTTGCCAGCTCCT  |                |
| 59      | ATTGAGGAGCTGGCCAAGGAGCTGGCCGACCTGAACCTGGAC  | NES27          |
| 60      | GCTAGTCCAGGTTTCAGGTCGGCCAGCTCCTTGCCAGCTCCT  |                |
| 61      | ATTGACGAGCTGCTGAAGCTGCTGCCCCGACCTGAACCTGGAC | NES28          |
| 62      | GCTAGTCCAGGTTTCAGGTCGGGCAGCAGCTTCAGCAGCTCGT |                |
| 63      | ATTGACGAGCTGCTGAAGGCCCTGCCCCGACCTGAACCTGGAC | NES29          |
| 64      | GCTAGTCCAGGTTTCAGGTCGGGCAGGGCCTTCAGCAGCTCGT |                |
| 65      | ATTGACGAGCTGGCCAAGCTGCTGGCCGACCTGAACCTGGAC  | NES30          |
| 66      | GCTAGTCCAGGTTTCAGGTCGGCCAGCAGCTTGCCAGCTCGT  |                |
| 67      | ATTGACGAGCTGGCCAAGGCCCTGGCCGACCTGAACCTGGAC  | NES31          |
| 68      | GCTAGTCCAGGTTTCAGGTCGGCCAGGGCCTTGCCAGCTCGT  |                |
| 69      | ATTGACGAGCTGGCCAAGCTGCTGCCCCGACCTGGACCTGGAC | NES32          |
| 70      | GCTAGTCCAGGTTTCAGGTCGGGCAGCAGCTTGCCAGCTCGT  |                |
| 71      | ATTGACGAGCTGGCCAAGGCCCTGCCCCGACCTGGACCTGGAC | NES33          |
| 72      | GCTAGTCCAGGTTTCAGGTCGGGCAGGGCCTTGCCAGCTCGT  |                |

Supplementary Tab. 2 continued

| oligo # | Sequence 5' --> 3'                                                                               | NES introduced |
|---------|--------------------------------------------------------------------------------------------------|----------------|
| 73      | ATTGATGAGGCGGCAAAAGAACTTCCAGATGCTAATTTG                                                          | /              |
| 74      | GCTACAAATTAGCATCTGGAAGTTCTTTTGCCGCCTCAT                                                          |                |
| 75      | TTTTCGTCTCTAACATGCGGTGACGTCGAGGAGAATCCTGGCCCAGGCGCCGCAGCA<br>AAGCGCGTGAAGCTG                     |                |
| 76      | TTTTCGTCTCTCATGCCAGAGCCAGCGAAGTCTGC                                                              |                |
| 77      | TTTTCGTCTCTTGTAGCAGACTTCTCTGCCCTCTCCACTGCCCTTGTACAGCTCGTC<br>CATGCCGAGAGTG                       |                |
| 78      | TTTTCGTCTCGAATTCGCCACCATGAAGTCTTCCGCGTGGATCCGGCTTAC                                              |                |
| 79      | TTTTCGTCTCGAATTCGCCACCATGGCCGCAGCAAAGCGCGTGAAGCTGGACATGAA<br>GTCTTCCGCGTGGATC                    |                |
| 80      | TTTTCGTCTCTTCACTTGTCTTCACTGGCTGTGTATAAGGGAGCCTGAC                                                |                |
| 81      | TTTTCGTCTCTGTGAGCAAGGGCGAGGAGGATAACATG                                                           |                |
| 82      | TTTTCGTCTCCTTTCTTCTGCATTACGGGGCCGTC                                                              |                |
| 83      | AAAACGTCTCCGAAAACCATGGGCTGGGAGGCCTC                                                              |                |
| 84      | TTTTCGTCTCTGGCCGCTCGAGCTAGTCCAGGTTCAAGTC                                                         |                |
| 85      | TTTTGCTAGCATGCCAGCACCCGGATCCAGCAGCAGCTGGGCCAGCTGACCCTGGA<br>GAACCTGCAGGTGAGCAAGGGCGAGGAGCTGTTTAC |                |
| 86      | TTTTGCGGCCGCCTACTTGTACAGCTCGTCCATG                                                               |                |
| 87      | TTTTCGTCTCTCGAGCTAGTCCAGGTTCAAGTTCGGCCAGCTCCTTC                                                  |                |
| 88      | TTTTCGTCTCTTGTAGCAGACTTCTCTGCCCTCTCCACTGCCGTCCAGCTTTTTTCTTC<br>TTGGCTGC                          |                |
| 89      | TTTTCGTCTCTCTCGAGCGGCCGCCACTGTGCTGGATATC                                                         |                |
| 90      | TTTTCGTCTCTGGTGAAGTGAGGGAGTCATGCTGATTAAG                                                         |                |
| 91      | TTTTCGTCTCTCACCTGAACCTCCAGATCCACCTTGTACAGCTCGTCCATG                                              |                |
| 92      | GGACTCAGATCTCGAGCTCAAGC                                                                          |                |
| 93      | TAGAGTCGCGGCCGCTCGAGTCATTGTCTTCACTGGCTGTGTATAAGGGAG                                              |                |
| 94      | TTTTAACGTCTCACATGGAGGAGCCGCAGTCAGATCCTAG                                                         |                |
| 95      | TTTTCGTCTCTTACGTCTGAGTCAGGCCCTTCT                                                                |                |
| 96      | TTTTAAGCTTATGGAGGAGCCGCAGTCAGATC                                                                 |                |
| 97      | TTTAGGATCCTCCACCTCCGTCTGAGTCAGGCCCTTCTG                                                          |                |
| 98      | TTTTGGAGGATCCGTGAGCAAGGGCGAGGAGGATAACATGG                                                        |                |
| 99      | TTTTGGAGGTGGAGGATCCATGTTAGCCTTCAAATTAGCAGGTCTTGATATCGTGAGCA<br>AGGGCGAGGAGG                      |                |
| 100     | TTTTCTCGAGTACTTGTACAGCTCGTCCATGCCGCCGGTG                                                         |                |

# Supplementary Note 1

## Details on LEXY engineering by “J $\alpha$ helix topping”

The idea behind LEXY is to photocage an NES in the J $\alpha$  helix, so that it is exposed and able to interact with CRM1 receptors only in the lit state. The possibility to photocage short peptides in the J $\alpha$  helix of the *AsLOV2* domain has been shown by several groups<sup>2, 4-7</sup>. In all these cases, the specific peptide to be caged was either directly appended to the end of a truncated *AsLOV2* J $\alpha$  helix<sup>2, 6, 7</sup> or embedded within the helix<sup>2, 4, 5</sup>, thereby replacing a continuous stretch of *AsLOV2* residues by the sequence to be caged. In contrast, we used the wild type *AsLOV2* J $\alpha$  helix itself as starting scaffold and applied synthetic biology principles to progressively introduce known, NES-like features while highly preserving the native J $\alpha$  helix composition. We term this approach “J $\alpha$  helix topping” to signify that the J $\alpha$  helix is “topped up” with a new characteristic (an NES in this case). To this end, we first investigated the distribution of non-charged, hydrophobic residues naturally present within the wild type *AsLOV2* J $\alpha$  helix. We found that the wild type J $\alpha$  helix carries a pattern of hydrophobic residues (A542-L546-A549-L551) matching that of the mammalian NES consensus sequence (*L-x*(2,3)-[LIVFM]-*x*(2,3)-L-*x*-[LI])<sup>1</sup> considerably well (Supplementary Fig. 1). Next, we introduced up to four point mutations into the J $\alpha$  helix in order to adapt several helix residues – in particular A542 and A549 - to corresponding hydrophobic residues present in well-



studied NESs (HIV REV<sup>8</sup>, IκBα<sup>9</sup>, p53<sup>10</sup> or PKI<sup>11</sup> NES) or to preferred (i.e. frequent) amino acids as derived from a previously reported NES sequence alignment<sup>1</sup> of 58 experimentally validated NESs (Supplementary Fig. 1, NES sequence logo and NES 1-10). The resulting ten *AsLOV2*-NES hybrids were screened by qualitatively investigating the nucleocytoplasmic translocation of NLS-mCherry-*AsLOV2*-NES fusion constructs in human embryonic kidney (HEK 293T) cells upon pulsatile blue light irradiation using an epifluorescence microscope (Supplementary Fig. 2a,b; NES 1-10). We found modest, but significant light-induced nuclear export only for the construct harbouring NES 8, which contains four leucines representing an ideal NES consensus (Supplementary Figs. 1 and 2b).

Using NES 8 as lead candidate, we then constructed a second (optimization) library (Supplementary Figs. 1 and 2b; NES 11-33) by adapting single or multiple residues in NES 8 to preferred residues derived from the NES sequence alignment<sup>1</sup>, while leaving the four leucines representing the NES consensus (L542, L546, L549 and L551) untouched. We also included three *AsLOV2*-NES hybrids (NES11-13) carrying an elongated C-terminus.

## Supplementary References

1. la Cour, T. et al. NESbase version 1.0: a database of nuclear export signals. *Nucleic Acids Res* **31**, 393-396 (2003).
2. Niopek, D. et al. Engineering light-inducible nuclear localization signals for precise spatiotemporal control of protein dynamics in living cells. *Nature communications* **5**, 4404, doi:10.1038/ncomms5404 (2014).
3. Kanda, T., Sullivan, K.F. & Wahl, G.M. Histone-GFP fusion protein enables sensitive analysis of chromosome dynamics in living mammalian cells. *Curr Biol* **8**, 377-385 (1998).
4. Lungu, O.I. et al. Designing photoswitchable peptides using the AsLOV2 domain. *Chemistry & biology* **19**, 507-517 (2012).
5. Yi, J.J., Wang, H., Vilela, M., Danuser, G. & Hahn, K.M. Manipulation of endogenous kinase activity in living cells using photoswitchable inhibitory peptides. *ACS Synth Biol* **3**, 788-795 (2014).
6. Strickland, D. et al. TULIPs: tunable, light-controlled interacting protein tags for cell biology. *Nature methods* **9**, 379-384 (2012).
7. Yumerefendi, H. et al. Control of Protein Activity and Cell Fate Specification via Light-Mediated Nuclear Translocation. *PloS one* **10**, e0128443, doi: 10.1371/journal.pone.0128443 (2015).
8. Fischer, U., Huber, J., Boelens, W.C., Mattaj, I.W. & Luhrmann, R. The HIV-1 Rev activation domain is a nuclear export signal that accesses an export pathway used by specific cellular RNAs. *Cell* **82**, 475-483 (1995).
9. Johnson, C., Van Antwerp, D. & Hope, T.J. An N-terminal nuclear export signal is required for the nucleocytoplasmic shuttling of I $\kappa$ B $\alpha$ . *EMBO J* **18**, 6682-6693 (1999).
10. Stommel, J.M. et al. A leucine-rich nuclear export signal in the p53 tetramerization domain: regulation of subcellular localization and p53 activity by NES masking. *EMBO J* **18**, 1660-1672 (1999).
11. Hauer, J.A., Barthe, P., Taylor, S.S., Parello, J. & Padilla, A. Two well-defined motifs in the cAMP-dependent protein kinase inhibitor (PKI $\alpha$ ) correlate with inhibitory and nuclear export function. *Protein Sci* **8**, 545-553 (1999).
